# Supplementary material for: Structural diversity and tetrel bonding significance in lead(ii) complexes with pyrazoylisonicotinoylhydrazone and varied anionic co-ligands
Source: Royal Society of Chemistry journal article supplement (doi:10.1039/d4ce00325j), 2024-01-01
Supplement: d4ce00325j1.pdf [file d4ce00325j1.pdf]

**Supporting Information File for manuscript:**

**Structural diversity and tetrel bonding significance in lead(II) complexes with pyrazoylisonicotinoylhydrazone and varied anionic co-ligands**

Ghodrat Mahmoudi<sup>a</sup>, Isabel García-Santos<sup>b\*</sup>, Roi Fernández-Vázquez<sup>b</sup>, Rosa M. Gomila<sup>c</sup>, Alfonso Castiñeiras<sup>b</sup>, Esmail Doustkhah,<sup>d</sup> Ennio Zangrando<sup>e</sup>, and Antonio Frontera<sup>\*c</sup>

- a. Department of Chemistry, Faculty of Science, University of Maragheh, P.O. Box 55136-83111, Maragheh, Iran.
- b. Departamento de Química Inorgánica, Facultad de Farmacia, Universidad de Santiago de Compostela, E-15782 Santiago de Compostela, Spain. E-mail: isabel.garcia@usc.es.
- c. Department of Chemistry, Universitat de les Illes Balears. Crta de Valldemossa km 7.5, 07122 Palma de Mallorca (Balears), SPAIN.
- d. Chemistry Department, Faculty of Engineering and Natural Sciences, Istinye University, Sariyer, Istanbul 34396, Turkey
- e. Department of Chemical and Pharmaceutical Sciences, University of Trieste, Via L. Giorgieri 1, 34127 Trieste, Italy

**Table of contents:**

|          |        |
|----------|--------|
| Table S1 | Page 1 |
| Table S2 | Page 2 |
| Table S3 | Page 3 |

**Table S1.** Crystallographic Data and Details of Refinements for complexes **1 - 4**.

|                                                                | <b>1</b>                                          | <b>2</b>                                           | <b>3</b>                                                        | <b>4</b>                                                        |
|----------------------------------------------------------------|---------------------------------------------------|----------------------------------------------------|-----------------------------------------------------------------|-----------------------------------------------------------------|
| empirical formula                                              | C <sub>11</sub> H <sub>9</sub> N <sub>9</sub> OPb | C <sub>12</sub> H <sub>9</sub> N <sub>7</sub> OPbS | C <sub>11</sub> H <sub>9</sub> N <sub>7</sub> O <sub>3</sub> Pb | C <sub>11</sub> H <sub>9</sub> N <sub>7</sub> O <sub>4</sub> Pb |
| fw                                                             | 490.46                                            | 506.51                                             | 494.44                                                          | 510.44                                                          |
| cryst system                                                   | monoclinic                                        | monoclinic                                         | monoclinic                                                      | monoclinic                                                      |
| space group                                                    | <i>P</i> 2 <sub>1</sub> / <i>c</i>                | <i>P</i> 2 <sub>1</sub> / <i>c</i>                 | <i>P</i> 2 <sub>1</sub> / <i>c</i>                              | <i>P</i> 2 <sub>1</sub> / <i>c</i>                              |
| <i>a</i> (Å)                                                   | 8.7307(3)                                         | 8.4135(7)                                          | 7.1869(3)                                                       | 7.1282(3)                                                       |
| <i>b</i> (Å)                                                   | 16.6328(7)                                        | 16.6666(12)                                        | 18.1539(7)                                                      | 16.9244(6)                                                      |
| <i>c</i> (Å)                                                   | 9.6082(4)                                         | 10.1721(7)                                         | 10.3088(4)                                                      | 12.1283(5)                                                      |
| $\beta$ (°)                                                    | 100.1460(10)                                      | 95.905(2)                                          | 97.142(2)                                                       | 104.3430(10)                                                    |
| V (Å <sup>3</sup> )                                            | 1373.45(9)                                        | 1418.81(18)                                        | 1334.56(9)                                                      | 1417.56(10)                                                     |
| Z                                                              | 4                                                 | 4                                                  | 4                                                               | 4                                                               |
| D <sub>calcd</sub> (mg/m <sup>3</sup> )                        | 2.372                                             | 2.371                                              | 2.461                                                           | 2.392                                                           |
| $\mu$ (Mo-K $\alpha$ ) (mm <sup>-1</sup> )                     | 12.302                                            | 12.051                                             | 12.668                                                          | 11.936                                                          |
| F(000)                                                         | 912                                               | 944                                                | 920                                                             | 952                                                             |
| $\theta$ range (°)                                             | 2.48 - 30.51                                      | 2.35 - 27.48                                       | 2.24 - 28.28                                                    | 2.41 to 26.37                                                   |
| Collected refls                                                | 41121                                             | 24267                                              | 28327                                                           | 27636                                                           |
| Indep reflections                                              | 4198                                              | 3231                                               | 3308                                                            | 2895                                                            |
| <i>R</i> <sub>int</sub>                                        | 0.0298                                            | 0.0577                                             | 0.0476                                                          | 0.0705                                                          |
| Obsrvd refls <i>I</i> > 2 $\sigma$ ( <i>I</i> )                | 3849                                              | 2807                                               | 3013                                                            | 2500                                                            |
| Parameters                                                     | 205                                               | 205                                                | 199                                                             | 214                                                             |
| GOF on <i>F</i> <sup>2</sup>                                   | 1.090                                             | 1.032                                              | 1.073                                                           | 1.228                                                           |
| <i>R</i> 1 ( <i>I</i> > 2 $\sigma$ ( <i>I</i> )) <sup>a</sup>  | 0.0144                                            | 0.0214                                             | 0.0199                                                          | 0.0341                                                          |
| <i>wR</i> 2 ( <i>I</i> > 2 $\sigma$ ( <i>I</i> )) <sup>a</sup> | 0.0303                                            | 0.0422                                             | 0.0456                                                          | 0.0849                                                          |
| residuals (e Å <sup>-3</sup> )                                 | 0.703, -0.807                                     | 0.762, -0.798                                      | 0.735, -1.333                                                   | 2.266, -1.212                                                   |

<sup>a</sup>  $R1 = \frac{\sum ||F_o| - |F_c||}{\sum |F_o|}$ ,  $wR2 = \frac{\sum w (F_o^2 - F_c^2)^2}{\sum w (F_o^2)^2}$  ]<sup>1/2</sup>

Table S2. Hydrogen bond parameters (Å /°) for complexes **1 - 4**.

| D-H              | d(D-H)   | d(H..A)  | d(D..A)   | <DHA   | A  | Symmetry code     |
|------------------|----------|----------|-----------|--------|----|-------------------|
| <b>Complex 1</b> |          |          |           |        |    |                   |
| N5-H5a           | 0.77(3)  | 2.26(3)  | 2.604(2)  | 108(2) | N3 | intra             |
| N5-H5b           | 0.82(3)  | 2.10(3)  | 2.907(3)  | 170(2) | N6 | 1+x,1/2-y,1/2+z   |
| C2-H2            | 0.94     | 2.59     | 3.426(3)  | 148    | N9 | 3-x,-y,2-z        |
| C3-H3            | 0.94     | 2.46     | 3.168(2)  | 132    | O1 | 1+x,y,z           |
| C9-H9            | 0.94     | 2.58     | 3.485(3)  | 162    | O1 | x,1/2-y,-1/2+z    |
| <b>Complex 2</b> |          |          |           |        |    |                   |
| N5-H15a          | 0.81(5)  | 2.23(5)  | 2.601(5)  | 108(4) | N3 | intra             |
| N5-H15a          | 0.81(5)  | 2.82(5)  | 3.503(4)  | 144(4) | S1 | x,1/2-y,-1/2+z    |
| N5-H15b          | 0.71(5)  | 2.23(5)  | 2.919(5)  | 167(5) | N6 | 1+x,1/2-y,1/2+z   |
| C3-H3            | 0.95     | 2.46     | 3.112(5)  | 126    | O1 | 1+x,y,z           |
| <b>Complex 3</b> |          |          |           |        |    |                   |
| N5-H15a          | 0.71(4)  | 2.31(4)  | 2.589(4)  | 106(4) | N3 | intra             |
| N5-H15a          | 0.71(4)  | 2.46(4)  | 3.103(4)  | 153(4) | O2 | 1-x,-y,1-z        |
| N5-H15b          | 0.82(4)  | 2.18(4)  | 2.945(4)  | 156(4) | N6 | 1-x,1/2+y,1/2-z   |
| C2-H2            | 0.95     | 2.31     | 3.115(4)  | 142    | O1 | 2-x,1/2+y,3/2-z   |
| C10-H10          | 0.95     | 2.51     | 3.441(4)  | 167    | O2 | x,-1/2-y,-1/2+z   |
| <b>Complex 4</b> |          |          |           |        |    |                   |
| N5-H5a           | 0.84(9)  | 2.16(9)  | 2.561(9)  | 110(7) | N3 | intra             |
| N5-H5a           | 0.84(9)  | 2.53(10) | 3.266(10) | 147(8) | O2 | 1-x,-y,-z         |
| N5-H5b           | 0.78(10) | 2.26(0)  | 2.954(10) | 149(8) | N6 | 1-x,-1/2+y,-1/2-z |
| C1-H1            | 0.94     | 2.53     | 3.250(12) | 134    | O3 | 2-x,-y,1-z        |
| C2-H2            | 0.94     | 2.44     | 3.130(10) | 131    | O1 | 2-x,-1/2+y,1/2-z  |
| C8-H8            | 0.94     | 2.58     | 3.302(9)  | 134    | O2 | 1-x,-y,-z         |
| C10-H10          | 0.94     | 2.60     | 3.138(12) | 116    | N5 | 1-x,1/2+y,-1/2-z  |
| C10-H10          | 0.94     | 2.50     | 3.306(10) | 144'   | O2 | x,1/2-y,-1/2+z    |

Table S3.  $\pi\cdots\pi$ -stacking interaction distances (Å) and angles (°) for complexes **1 - 4** (py = pyridine N6, pz = pyrazine N1/N4).

| Cg(I)            | Cg(J) | Cg(J)<br>Symmetry | d(Cg(I)-<br>Cg(J))<br>Å | $\alpha/^\circ$ | $\beta/^\circ$ | $\gamma/^\circ$ | Slippage<br>Å |
|------------------|-------|-------------------|-------------------------|-----------------|----------------|-----------------|---------------|
| <b>Complex 1</b> |       |                   |                         |                 |                |                 |               |
| Pz               | Pz    | 3-x, -y, 2-z      | 3.545(1)                | 0.00(9)         | 26.0           | 26.0            | 1.552         |
| Pz               | Py    | 2-x, -y, 1-z      | 3.562(1)                | 5.70(9)         | 21.8           | 26.0            | 1.322         |
| Py               | Pz    | 2-x, -y, 1-z      | 3.562(1)                | 5.70(9)         | 26.0           | 21.8            | 1.560         |
| <b>Complex 2</b> |       |                   |                         |                 |                |                 |               |
| Pz               | Py    | -x, -y, 1-z       | 3.563(2)                | 0.45(17)        | 24.5           | 24.6            | 1.480         |
| Py               | Pz    | -x, -y, 1-z       | 3.563(2)                | 0.45(17)        | 24.6           | 24.5            | 1.482         |
| <b>Complex 3</b> |       |                   |                         |                 |                |                 |               |
| Pz               | Py    | 1-x, -y, 1-z      | 3.560(2)                | 3.37(16)        | 20.1           | 19.3            | 1.226         |
| Pz               | Py    | 2-x, -y, 1-z      | 3.635(2)                | 3.37(16)        | 25.3           | 24.1            | 1.552         |
| Py               | Pz    | 1-x, -y, 1-z      | 3.560(2)                | 3.37(16)        | 19.3           | 20.1            | 1.175         |
| Py               | Pz    | 2-x, -y, 1-z      | 3.635(2)                | 3.37(16)        | 24.1           | 25.3            | 1.484         |
| <b>Complex 4</b> |       |                   |                         |                 |                |                 |               |
| Pz               | Py    | 1-x, -y, -z       | 3.585(5)                | 4.6(4)          | 15.2           | 15.2            | 0.940         |
| Pz               | Py    | 2-x, -y, -z       | 3.558(5)                | 4.6(4)          | 20.2           | 18.6            | 1.228         |
| Py               | Pz    | 1-x, -y, -z       | 3.585(5)                | 4.6(4)          | 15.2           | 15.2            | 0.939         |
| Py               | Pz    | 2-x, -y, -z       | 3.558(5)                | 4.6(4)          | 18.6           | 20.2            | 1.135         |
